# Supplementary material for: HMGA2 Antisense Long Non-coding RNAs as New Players in the Regulation of HMGA2 Expression and Pancreatic Cancer Promotion
Source: PubMed Central journal article supplement (PMC6978849; doi:10.3389/fonc.2019.01526), 2020-01-17
Supplement: Data_Sheet_1.pdf [file Data_Sheet_1.pdf]

**Supplemental Table 1.** Primers used for qRT-PCR and classic RT-PCR.

| <b>Target</b>                     | <b>Primer For</b>            | <b>Primer Rev</b>        |
|-----------------------------------|------------------------------|--------------------------|
| GAPDH                             | TCTCTGCTCCTCCTGTTC           | GCCCAATACGACCAAATCT      |
| HMGA2                             | AGCAGAAGCCACTGGAGAAA         | TCTTCGGCAGACTCTTGTGA     |
| Group ABGI or HMGA2-AS1           | GAGGAGCTGCTGAGTTCAAACA       | CTGGGTTGCTGGGTGCTTT      |
| Group CDE                         | CGGGCTCTTCATTAGCAACC         | TGCTGCTGTTTTCTTCTGCTG    |
| Group FH                          | GCCAACA TGACACCAAACCTCTC     | TGCTGCTGTTTTCTTCTGCTG    |
| A2-AS1_ A                         | CTCACCTGTCACTCCTCCACTG       | TATTGTTGACACCAGCTTGTGGG  |
| A2-AS1_ F                         | GCCAACATGACACCAAACCTCTC      | CTTCTTTTCAGCAGTGCC       |
| A2-AS1_ G                         | CTCACCTGTCACTCCTCCACTG       | TGCTGCTGTTTTCTTCTGCTG    |
| A2-AS1_ H                         | CGTGATTAACCCAAGGATGTTG       | GCCTTCCCATCTTGACACTCAG   |
| A2-AS1_ I                         | GGAATGTGTGCGGAGTCAATAC       | TCTCTGAGGGTCTCCAGAGTTT   |
| E-Cadherin                        | AAGTGTCCGAGGACTTTGGCGTG<br>G | CAGCCAGTTGGCAGTGTCTCTCCA |
| N-Cadherin                        | CATCACAGTGGCAGCTGGACTTG      | GGCCGTGGCTGTGTTTGAAAGG   |
| Vimentin                          | CCAGCTAACCAACGACAAAGCCC<br>G | TGCGTTCAAGGTCAAGACGTGCCA |
| A2-AS1_ B/F/G/H<br>classic RT-PCR | GCCAACATGACACCAAACCTCTC      | TGCTGCTGTTTTCTTCTGCTG    |

# Supplemental Figure 1

## HMGA1 locus

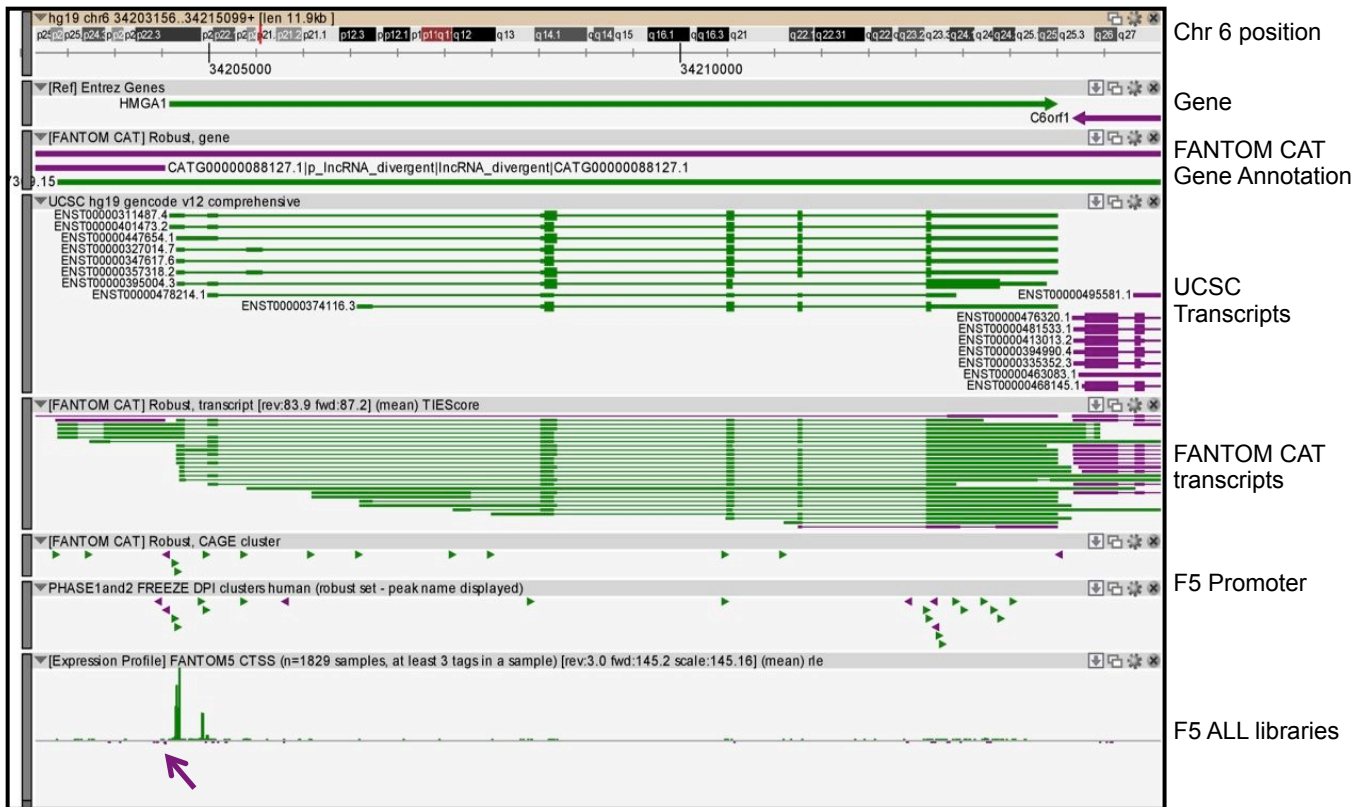

## HMGA1 locus: 5' zoom

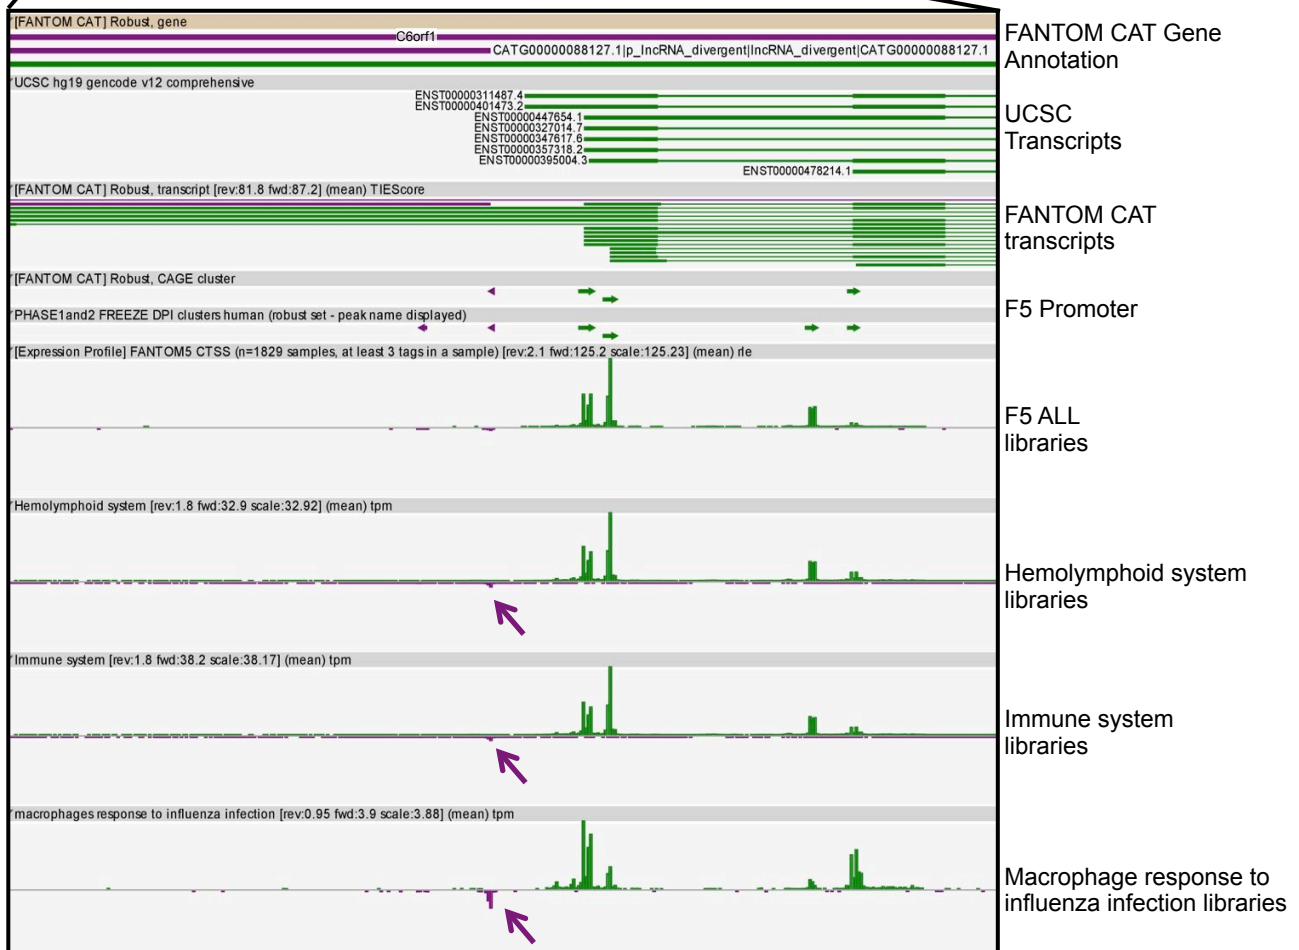

**Supplemental Figure 1. FANTOM-CAT analyses reveal the presence of one natural antisense lncRNA in *HMGAI* locus.** A Zenbu genome browser view of gene locus for human *HMGAI*. Genes and transcripts are color-coded according to their orientation in the genome (+ strand, green; – strand, purple). Upper panel reports from top to bottom: Genomic coordinates (Chr 6:34,203,156-34,215,099). NCBI Gene bodies. FANTOM-CAT Gene Annotation. Annotated UCSC transcripts and Robust FANTOM-CAT transcripts, with exon (thick lines) and intron (thin lines) boundaries. FANTOM5 promoters (robust CAT clusters and robust DPI) are indicated as arrowheads. Expression profile is visualized as quantitative histogram by FANTOM5 TSS as the mean of rle (all libraries, n=1829 samples, at least 3 tag in a sample). Lower panel contains a zoom of ZENBU visualization of FANTOM-CAT analyses of *CATG00000088127.1* that localized in the promoter region of *HMGAI*. The panel reports from top to bottom: FANTOM-CAT Gene Annotation; Annotated UCSC transcripts and Robust FANTOM-CAT transcripts; FANTOM5 promoters (robust CAT clusters and robust DPI) are indicated as arrowheads. Expression profile is reported as quantitative histogram in all FANTOM5 libraries (rle). Expression profile is reported as quantitative histogram derived from Hemolymphoid and Immune system libraries and from Dynamic expression in Macrophage response to influenza infection libraries (tpm). Purple arrow points to the TSS of *CATG00000088127.1*.

**Supplemental Table 2.** Dynamic Expression of HMGA2, RPSAP52, HMGA2-AS1 and RP11-366L20.3

| Gene Name                                                                      | Series Name                                                                    | Max FC                                              | FDR        |
|--------------------------------------------------------------------------------|--------------------------------------------------------------------------------|-----------------------------------------------------|------------|
| <b>HMGA2</b>                                                                   | mesenchymal stem cells differentiation to adipocyte                            | -5.56                                               | 0.00102    |
|                                                                                | Myoblast differentiation to myotubes, Duchenne Muscular Dystrophy              | -3.34                                               | 0.0013     |
|                                                                                | preadipocyte maturation                                                        | -3.23                                               | 0.0151     |
|                                                                                | ARPE-19 EMT induced with TGFb and TNFa, to mesenchymal                         | 1.97                                                | 0.000264   |
|                                                                                | Myoblast differentiation to myotubes, Duchenne Muscular Dystrophy              | -3.15                                               | 1.87E-09   |
|                                                                                | 293SLAM rinderpest infection                                                   | -2.39                                               | 1.44E-75   |
|                                                                                | iPSC differentiation to neuron, Down syndrome                                  | -0.63                                               | 0.000483   |
|                                                                                | Saos-2 osteosarcoma treated with ascorbic acid and BGP to induce calcification | 0.99                                                | 0.00663    |
|                                                                                | ARPE-19 EMT induced with TGFb and TNFa, to mesenchymal                         | 1.1                                                 | 0.00377    |
|                                                                                | HES3-GFP Embryonic Stem cells cardiomyocytic induction                         | 1.3                                                 | 0.000073   |
|                                                                                | H9 Embryoid body cells, melanocytic induction                                  | 1.48                                                | 0.00172    |
|                                                                                | COBL-a rinderpest infection                                                    | 2.48                                                | 0.0322     |
|                                                                                | <b>HMGA2-AS1</b>                                                               | mesenchymal stem cells differentiation to adipocyte | -7.29      |
| Saos-2 osteosarcoma treated with ascorbic acid and BGP to induce calcification |                                                                                | 2.48                                                | 0.00000346 |

**Supplemental Table 3.** GWAS of HMGA2, RPSAP52, HMGA2-AS1 and RP11-366L20.3

| <b>Gene Name</b> | <b>Trait Name</b>                     | <b># of SNPs</b>          | <b>Best SNP P-value</b> |             |
|------------------|---------------------------------------|---------------------------|-------------------------|-------------|
| <b>HMGA2</b>     | Polycystic Ovary Syndrome             | 4                         | 2E-21                   |             |
|                  | Type 2 Diabetes Mellitus              | 17                        | 1E-19                   |             |
|                  | Abnormality Of Body Weight            | 6                         | 1E-19                   |             |
|                  | End Stage Renal Failure               | 6                         | 1E-19                   |             |
|                  | Birth Weight                          | 6                         | 1E-19                   |             |
|                  | Alzheimer S Disease                   | 12                        | 1E-12                   |             |
|                  | Tooth Disease                         | 12                        | 2E-12                   |             |
|                  | Premature Eruption Of Permanent Teeth | 12                        | 2E-12                   |             |
|                  | Dentition                             | 4                         | 6E-11                   |             |
|                  | Anodontia                             | 4                         | 1E-10                   |             |
|                  | Conduct Disorder                      | 6                         | 3E-10                   |             |
|                  | Neurodegenerative Disease             | 6                         | 3E-10                   |             |
|                  | Cognitive Disorder                    | 6                         | 3E-10                   |             |
|                  | Obesity                               | 6                         | 0.000000222             |             |
|                  | Adiposity                             | 6                         | 0.000000222             |             |
|                  | <b>HMGA2-AS1</b>                      | Polycystic Ovary Syndrome | 12                      | 2E-21       |
|                  |                                       | Type 2 Diabetes Mellitus  | 19                      | 0.000000003 |

**Supplemental Table 4.** Coding potential of natural antisense RNAs in the HMGA2-AS1 locus based on cPAT, RNACode, phyloCSF and sORF riboseq tools.

| Transcript Variant | Transcript ID     | cPAT coding | RNACode coding | phyloCSF coding | sORF riboseq coding |
|--------------------|-------------------|-------------|----------------|-----------------|---------------------|
| A2-AS1_A           | ENST00000504038.2 | no          | no             | no              | no                  |
| A2-AS1_B           | MICT00000081499.1 | no          | no             | no              | no                  |
| A2-AS1_C           | MICT00000081500.1 | yes         | no             | no              | no                  |
| A2-AS1_D           | ENST00000439236.2 | yes         | no             | no              | no                  |
| A2-AS1_E           | ENST00000356215.2 | yes         | no             | no              | no                  |
| A2-AS1_F           | HBMT00000335645.1 | no          | no             | no              | no                  |
| A2-AS1_G           | ENST00000536648.1 | no          | no             | no              | no                  |
| A2-AS1_H           | FTMT24500018418.1 | no          | no             | no              | no                  |
| A2-AS1_I           | FTMT24500052406.1 | no          | no             | no              | no                  |

**Supplemental Table 5.** Parameters of coding potential calculated by cPAT.

| Transcript Variant | cPAT Coding | cPAT Coding (Value) | ORF length | RNA length |
|--------------------|-------------|---------------------|------------|------------|
| A2-AS1_A           | No          | 0.28243             | 210        | 975        |
| A2-AS1_B           | No          | 0.10705             | 507        | 11499      |
| A2-AS1_C           | Yes         | 0.41612             | 447        | 2436       |
| A2-AS1_D           | Yes         | 0.43701             | 447        | 878        |
| A2-AS1_E           | Yes         | 0.46867             | 480        | 4661       |
| A2-AS1_F           | No          | 0.20503             | 168        | 691        |
| A2-AS1_G           | No          | 0.28495             | 210        | 748        |
| A2-AS1_H           | No          | 0.10034             | 153        | 490        |
| A2-AS1_I           | No          | 0.36178             | 147        | 246        |

## Supplemental Figure 2

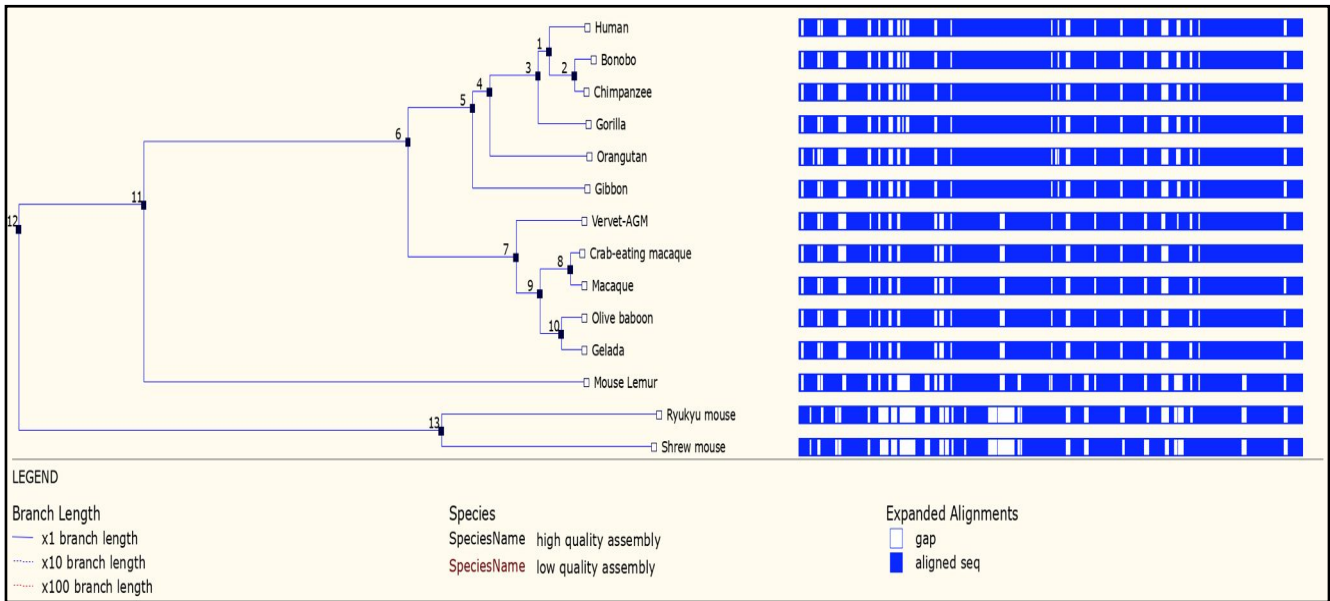

**Supplemental Figure 2. Multiple alignment analysis of HMG2-AS1.** EPO (Enredo, Pecan, Ortheus) multiple alignment (Location: 12:65854979\_65882767) of 35 mammalian genomes shows conservation of HMG2-AS1 in primates. No alignment in this region was found for *Mus spretus*, *Marmota marmota*, *Cavia aperea*, *Felis catus*, *Cricetulus griseus*, *Bos taurus*, *Canis lupus dingo*, *Canis lupus familiaris*, *Loxodonta africana*, *Capra hircus*, *Cavia porcellus*, *Equus caballus*, *Panthera pardus*, *Callithrix jacchus*, *Mus musculus*, *Maniculatus bairdii*, *Sus scrofa*, *Microtus ochrogaster*, *Oryctolagus cuniculus*, *Rattus norvegicus*, and *Ovis aries*.

### Supplemental Figure 3

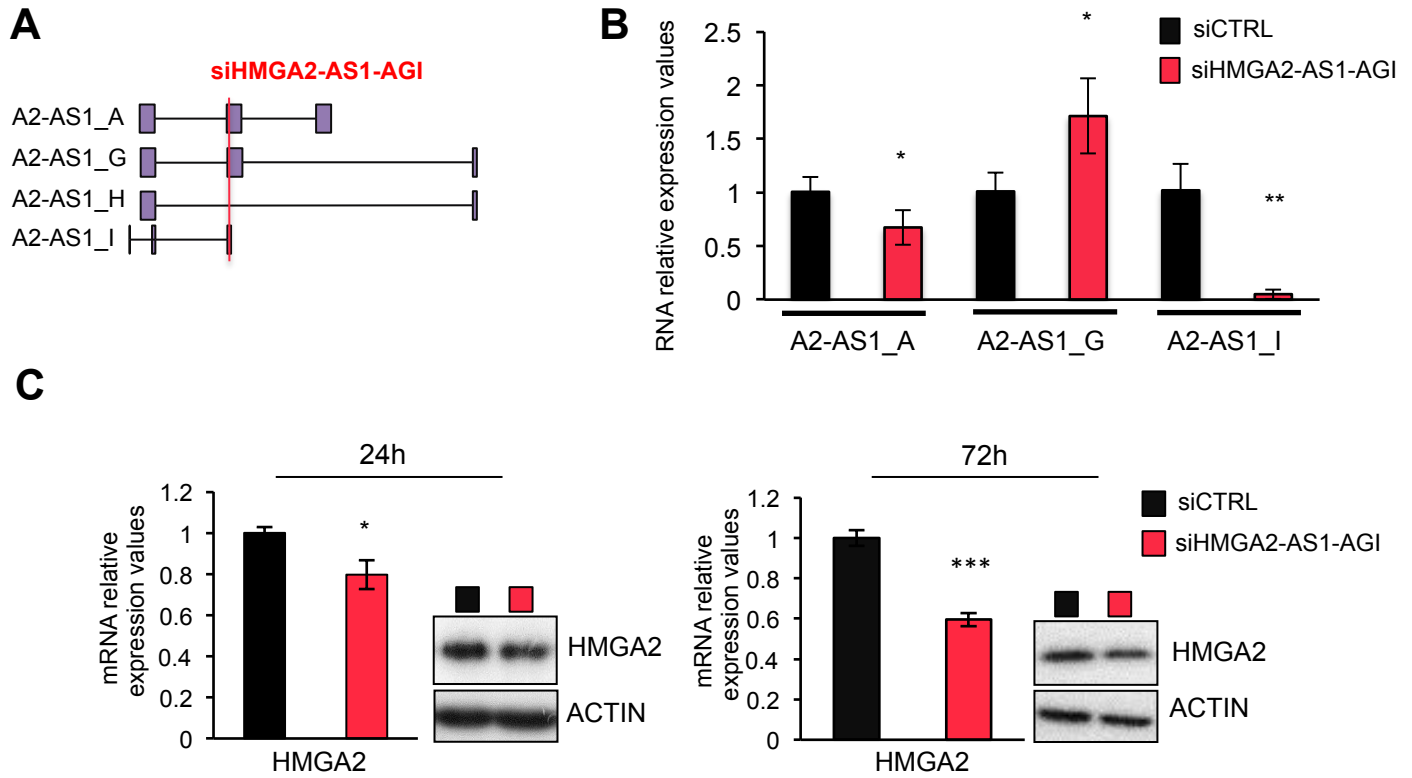

**Supplemental Figure 3. Natural antisense lncRNAs from *HMGA2-AS1* locus regulate *HMGA2* expression.** (A) Schematic representation of siHMGA2-AS1-AGI targeting (red line) on HMGA2-AS1 transcript variants. (B) Evaluation of the expression of different variants after siHMGA2-AS1-AGI transfection. qRT-PCR analysis of A2-AS1\_A, A2-AS1\_G and A2-AS1\_I levels after 72 hours of siHMGA2-AS1-AGI silencing in PANC1 cell line. 18S was used for normalization. The data are compared to siCTRL and are presented as the mean±SD ( $n=3$ ),  $*p\leq 0.05$ ,  $**p\leq 0.01$ ; two-tailed Student's  $t$ -test. (C) qRT-PCR and western blot analyses of HMGA2 in PANC1 cells silenced with siHMGA2-AS1-AGI for 24 and 72 hours. For qRT-PCR GAPDH was used for normalization, the data are compared to siCTRL and are presented as the mean±SD ( $n=3$ ),  $*p\leq 0.05$ ,  $***p\leq 0.001$ ; two-tailed Student's  $t$ -test. For protein analysis, a representative western blot is reported ( $n=3$ ).  $\beta$ -actin was used as a loading control. Also see uncropped figure scan in Supplementary Image 3-6.



## Supplemental Figure 4

**A**

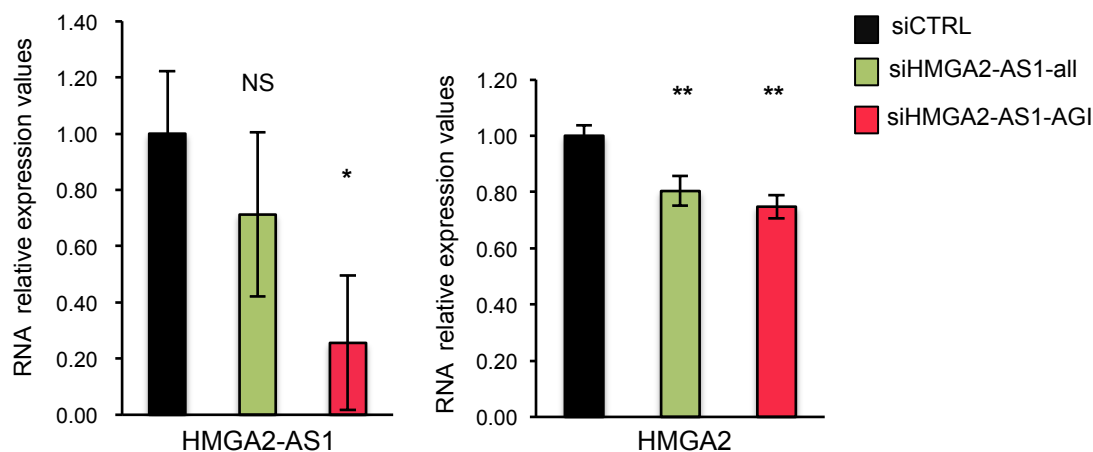

**B**

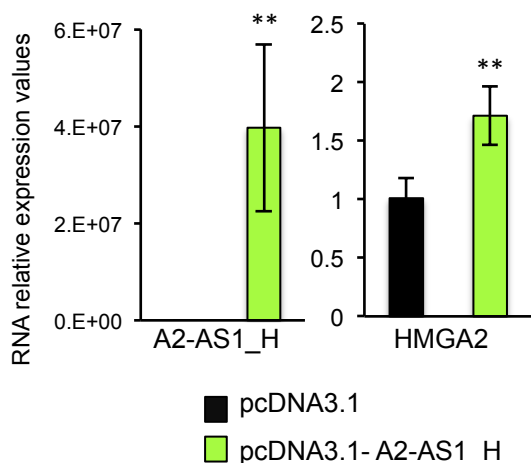

**C**

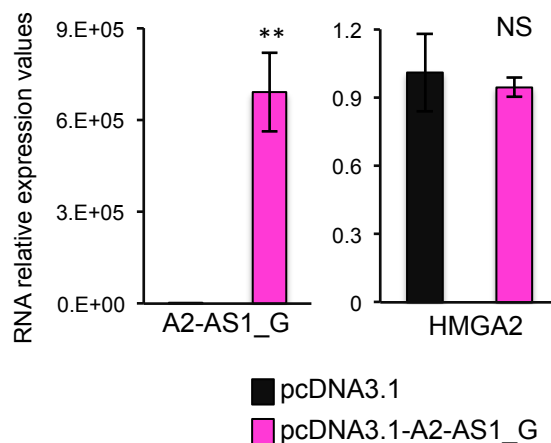

**Supplemental Figure 4. HMGA2-AS1 regulates the expression of HMGA2.** (A) qRT-PCR analysis of HMGA2-AS1 and HMGA2 after 72 hours of siHMGA2-AS1-all and siHMGA2-AS1-AGI silencing in PC3 cell line. Primers used to detect HMGA2-AS1 amplify together A2-AS1\_A, A2-AS1\_G and A2-AS1\_I. GAPDH was used for normalization. The data are compared to siCTRL and are presented as the mean±SD ( $n=3$ ), \* $p \leq 0.05$ , \*\* $p \leq 0.01$ ; (B and C) Levels of A2-AS1\_H and HMGA2 (B), and levels of A2-AS1\_G and HMGA2 (C), were detected via qRT-PCR in PANC1 cells, transfected with pcDNA3.1 (control) and pcDNA3.1-A2-AS1\_H (B) or pcDNA3.1-A2-AS1\_G (C) for 30 hours. GAPDH was used for normalization, the data are compared to pcDNA3.1 and are presented as the mean±SD ( $n=3$ ), NS: Not Significant, \*\* $p \leq 0.01$ ; two-tailed Student's  $t$ -test.

## Supplemental Figure 5

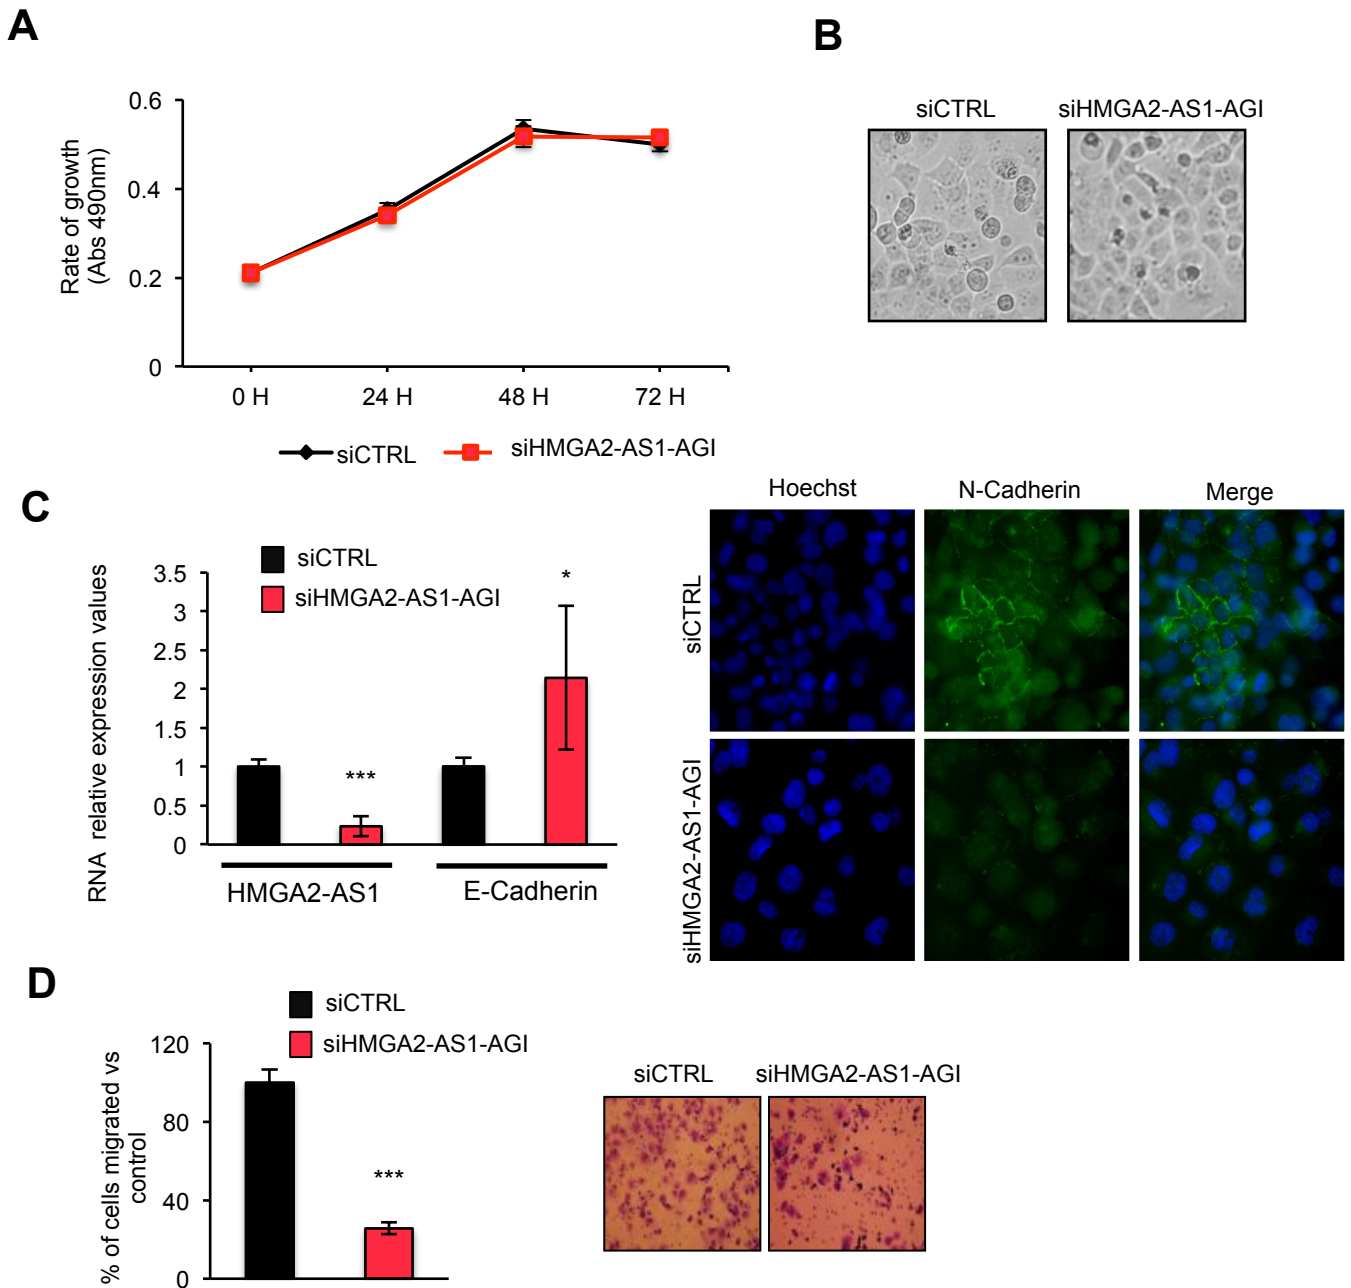

**Supplemental Figure 5. Natural antisense lncRNAs from *HMGA2-AS1* locus are involved in cancer promotion.** (A) MTS proliferation assay in PANC1 cells silenced or not for HMGA2-AS1 transcript variants with siHMGA2-AS1-AGI. The data are presented as mean $\pm$ SD ( $n=4$ ). (B) Representative pictures of cell morphology of PANC1 cell culture in control condition and after 72 hours of siHMGA2-AS1-AGI transfection. (C) qRT-PCR analysis of HMGA2-AS1 silencing and the epithelial marker E-cadherin after 72 hours of siHMGA2-AS1-AGI silencing in PANC1 cell line. Primers used to detect HMGA2-AS1 amplify together A2-AS1\_A, A2-AS1\_G and A2-AS1\_I. GAPDH was used for normalization. The data are compared to siCTRL and are presented as the mean $\pm$ SD ( $n=3$ ), \* $p\leq 0.05$ , \*\*\* $p\leq 0.001$ ; two-tailed Student's t-test. On the right, representative immunofluorescence images of the mesenchymal marker N-cadherin localization in PANC1 control and silenced cells with siHMGA2-AS1-AGI. Images were taken at 40X magnification. (D) Transwell assay of PANC1 cells silenced with siHMGA2-AS1-AGI for 72 hours. On the left, quantification of the transwell assay. The data are represented as the mean of percentage of migrated cells respect to siCTRL  $\pm$ SD ( $n=4$ ), \*\*\* $p\leq 0.001$ ; two-tailed Student's t-test. On the right, representative images of cells migrated across the porous membrane stained with crystal violet.

## Supplemental Figure 6

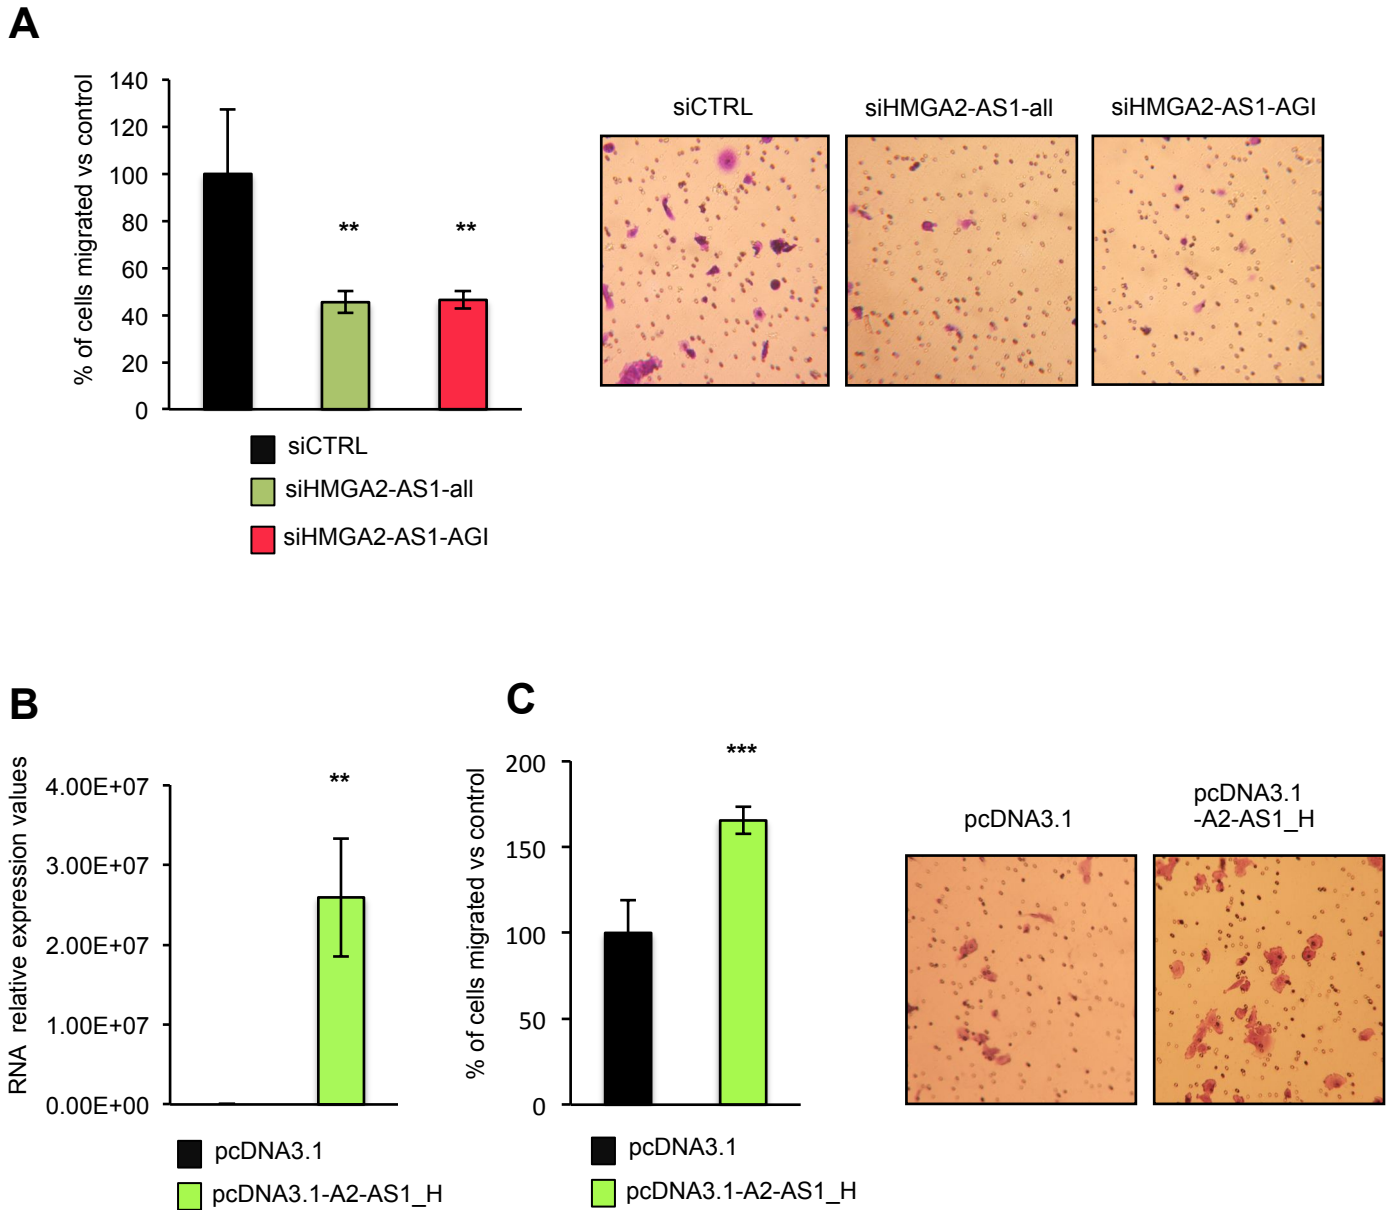

**Supplemental Figure 6. Natural antisense lncRNAs from *HMGA2-AS1* locus modulates cancer cell migration.** (A) Transwell assay of PC3 cells silenced with siHMGA2-AS1-all and siHMGA2-AS1-AGI for 72 hours. On the left, quantification of the transwell assay. The data are represented as the mean of percentage of migrated cells respect to siCTRL  $\pm$ SD (n=4), \*\* $p \leq 0.01$ ; two-tailed Student's t-test. On the right, representative images of cells migrated across the porous membrane stained with crystal violet. (B) qRT-PCR analysis of A2-AS1\_H transcript variants in BX-PC3 cells transfected with pcDNA3.1 (control) and pcDNA3.1-A2-AS1\_H for 30 hours. GAPDH was used for normalization. The data are compared to siCTRL and are presented as the mean  $\pm$ SD (n=3), \*\* $p \leq 0.01$ ; (C) Transwell assay of BX-PC3 cells treated as in (B). On the left, quantification of the transwell assay. The data are represented as the mean of percentage of migrated cells respect to siCTRL  $\pm$ SD (n=4), \*\*\* $p \leq 0.001$ ; two-tailed Student's t-test. On the right, representative images of cells migrated across the porous membrane stained with crystal violet.
